# Supplementary material for: Self-assembled Janus-like multi-ionic lithium salts form nano-structured solid polymer electrolytes with high ionic conductivity and Li+ion transference number
Source: Royal Society of Chemistry journal article supplement (doi:10.1039/c2ta00085g), 2012-11-19
Supplement: c2ta00085g_3.pdf [file c2ta00085g_3.pdf]

## Electronic Supplemental Information

Self-Assembled Janus-like Multi-Ionic Lithium Salts form Nano-structured Solid Polymer Electrolytes with High Conductivity and High  $\text{Li}^+$  Ion Transference Number

Parameswara Rao Chinnam and Stephanie L. Wunder\*

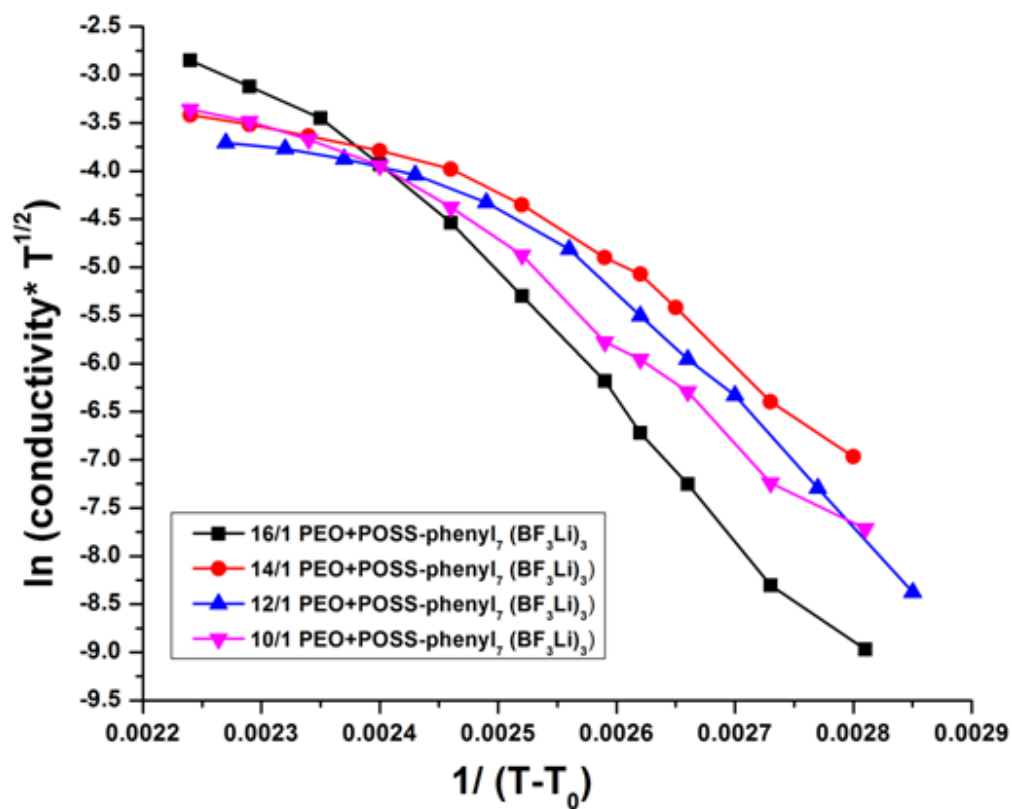

**Figure 1.** VTF plots of  $\text{POSS-phenyl}_7(\text{BF}_3\text{Li})_3/\text{PEO}$  as a function of O/Li ratio
